# Supplementary material for: Electrolyte engineering enables rapid and durable Zn–air self-charging batteries
Source: Royal Society of Chemistry journal article supplement (doi:10.1039/d5ee05459a), 2025-12-16
Supplement: d5ee05459a1.pdf [file d5ee05459a1.pdf]

## Supplementary Information

# Electrolyte Engineering Enables Rapid and Durable Zn— Air Self-charging Batteries

Jinghua Cai,<sup>a,b</sup> Tao Li,<sup>a,b</sup> Shicong Zhang,<sup>a,b</sup> Xinji Dong,<sup>a,b</sup> Tao Zhang,<sup>a,b</sup> Yang Xu,<sup>a,b</sup> Yi Shen,<sup>a,b</sup> Chenyu

Wei,<sup>a,b</sup> Hexian Ma,<sup>a,b</sup> Fuqiang Huang,<sup>\*a,b,c</sup> and Tianquan Lin<sup>\*a,b</sup>

<sup>a</sup> J. Cai, T. Li, S. Zhang, X. Dong, T. Zhang, Y. Xu, Y. Shen, C. Wei, H. Ma, F. Huang, T. Lin

Key Laboratory of Intelligent Creation for Extreme Energy Materials (MOE), School of Materials Science  
and Engineering, Shanghai Jiao Tong University, Shanghai, 200240, P.R. China

Email: [huangfq@sjtu.edu.cn](mailto:huangfq@sjtu.edu.cn); [tqlin@sjtu.edu.cn](mailto:tqlin@sjtu.edu.cn)

<sup>b</sup> J. Cai, T. Li, S. Zhang, X. Dong, T. Zhang, Y. Xu, Y. Shen, C. Wei, H. Ma, F. Huang, T. Lin

Zhangjiang Institute for Advanced Study (ZIAS), Shanghai Jiao Tong University Shanghai 201210, P.R.  
China

<sup>c</sup> F. Huang

Inner Mongolia Research Institute, Shanghai Jiao Tong University, Hohhot 010010, China

## Methods

### Synthesis Method

(NH<sub>4</sub>)<sub>2</sub>V<sub>10</sub>O<sub>25</sub>·8H<sub>2</sub>O nanobelts: (NH<sub>4</sub>)<sub>2</sub>V<sub>10</sub>O<sub>25</sub>·8H<sub>2</sub>O nanobelts were prepared by a previous method.<sup>1</sup> Typically, 0.585 g NH<sub>4</sub>VO<sub>3</sub> (99 %, Aladdin) and 0.63 g C<sub>2</sub>H<sub>2</sub>O<sub>4</sub>·2H<sub>2</sub>O (≥ 99.5 %, Aladdin) were added into 50 ml deionized water and stirred at room temperature for 1 h to obtain an orange solution. Finally, the above solution was transferred into a 100 mL Teflon-lined autoclave and heated at 180 °C for 3 h. After cooling to room temperature, the flocculent precipitates were washed with deionized water and dried at 60 °C.

(NH<sub>4</sub>)<sub>2</sub>V<sub>10</sub>O<sub>25</sub>·8H<sub>2</sub>O@Pt nanobelts: (NH<sub>4</sub>)<sub>2</sub>V<sub>10</sub>O<sub>25</sub>·8H<sub>2</sub>O @Pt nanobelts were prepared with a solution method. First, 0.1 g NVO nanobelts were added into 50 ml deionized water and ultrasonic 30 minutes. Second, 50 mg polyvinylpyrrolidone (PVP, Aladdin), 0.5 mg H<sub>2</sub>PtCl<sub>2</sub>·6H<sub>2</sub>O (Pt 37.5% min, Macklin), and 40 ml methyl alcohol were added to the above solution. Then stir and ultrasonically this solution for 30 minutes at room temperature. Then, 0.1 mg mL<sup>-1</sup> NaBH<sub>4</sub> (98%, Aladdin) aqueous solvent was dropped in slowly. Finally, continue stirring for 1 h and then wash with deionized water, alcohol, and dried at 60 °C.

Solvothermal method to synthesis Zn<sub>x+y</sub>(CF<sub>3</sub>SO<sub>3</sub>)<sub>2y</sub>(OH)<sub>2x</sub>·nH<sub>2</sub>O crystal: 2 mol L<sup>-1</sup> Zn(CF<sub>3</sub>SO<sub>3</sub>)<sub>2</sub> (99 %, Aladdin) and 0.5 mol L<sup>-1</sup> KOH (≥99.5 %, Aladdin) were added into 20 mL N,N-Dimethylacetamide (DMAC, 90 vol%) and deionized water (10 vol%) mixture solvent stirred at room temperature for 30 minutes to obtain an clarifying solvent. Finally, the above solution was transferred into a 50 mL Teflon-lined autoclave and heated at 120 °C for 22 h. After cooling to room temperature, the flocculent precipitates were washed with deionized water and dried at 60 °C. In pure aqueous solvent as the same preparation and heating time only for 3h.

### Characterization

The crystalline structure of NVO nanobelts and NVO@Pt interface was determined by powder X-ray diffractometer (XRD, Malvern Panalytical) with Cu Kα radiation (λ =

0.15405). The morphology and structure of the interface were characterized by scanning electron microscopy (SEM, Thermo Scientific Helios 5 CX) and transmission electron microscopy (TEM, FEI Talos F200X, and FEI Talos F200X G2) equipped with energy dispersive spectroscopy (EDS) for elemental analysis. The carbon nuclear magnetic resonance ( $^{13}\text{C}$  NMR) was collected using Nuclear Magnetic Resonance 500 (NMR 500). Fourier transform infrared spectroscopy (FT-IR, NICOLET 6700) and Raman spectroscopy (LabRAM Soleil, Horiba with excitation at 532nm) were collected to define the molecular structure. X-ray photoelectron spectroscopy (XPS) was collected by ESXCALAB Xi+ (Thermo Fisher Scientific). Time-of-flight-secondary ion mass spectroscopy (TOF-SIMS, Ion TOF ToF SIMS 5-100, Germany) was carried out to define the anion group in the degradation interface of NVO@Pt.

The desolvation energy of  $\text{Zn}^{2+}$  ions at DMAC and aqueous electrolytes, which were measured by the variation of Charge transfer resistance ( $R_{\text{ct}}$ ) of  $\text{Zn}||\text{Zn}$  batteries with the test temperature ranging from 30-70 °C, and calculated by the Arrhenius formula. The linear sweep voltammetry (LSV) of  $\text{Zn}||\text{Ti}$  batteries was collected by using the CHI660E electrochemical workstation. The electrochemical performance of air self-charging and conventional  $\text{Zn}||(\text{NH}_4)_2\text{V}_{10}\text{O}_{25}\cdot 8\text{H}_2\text{O}@Pt$  batteries was measured in an open fabricated battery and the CR2016 coin cell, respectively. The galvanostatic discharge/charging (GCD) tests were conducted by using a battery test system (LAND CT2001A) in a voltage range of 0.2-1.6 V.

### **Electrochemical measurement**

Electrochemical performance of the  $\text{Zn}||(\text{NH}_4)_2\text{V}_{10}\text{O}_{25}\cdot 8\text{H}_2\text{O}@Pt$  air self-charging battery was measured in an open-fabricated battery. The NVO@Pt electrode was prepared by mixing the above powder with MWCNT and PVDF in a weight ratio of 7:2:1 added into an appropriate amount NMP solvent, and stirred for 12 h. Then, the slurry was coated on titanium meshes and dried at 70 °C for 12 h under vacuum. The mass loading of NVO@Pt in the electrode is  $\sim 1 \text{ mg cm}^{-2}$ , (according to ICP-MS result (V: 39%, Pt: 0.4%), Pt mass is neglected). DMAC solvent with 10 vol%  $\text{H}_2\text{O}$  and 2 M  $\text{Zn}(\text{CF}_3\text{SO}_3)_2$  zinc salt was adopted as DMAC electrolyte. In  $\text{H}_2\text{O}$  electrolyte was added

the same 2 M  $\text{Zn}(\text{CF}_3\text{SO}_3)_2$  zinc salt. These open system batteries were assembled with the as-obtained NVO@Pt and Zn foil with a thickness of 30  $\mu\text{m}$  as cathode and anode, respectively, in a glass bottle with 1 mL electrolyte and Ti electrode clamp. The coin cell was measured in CR2016, and commercial glass fiber and Zn foil with a thickness of 30  $\mu\text{m}$  as the separator and anode, respectively. The galvanostatic discharge tests were carried out by using a battery test system (LAND CT2001A) in a voltage range of 0.2-1.6 V. The LAND system only records the battery voltage change when the battery is cycled through the air self-charging process. At  $\text{O}_2$  atmosphere, 99.9% pure oxygen is slightly injected below the DMAC electrolyte level during the self-charging process.

### Theoretical Calculation

The geometry optimization and density functional theory (DFT) chemical description for the molecular structures of all title compounds were performed using Gaussian 09 program<sup>2</sup> package with M062X exchange-correlation functional and 6-311+G\*\* basis set<sup>3, 4</sup> for C, H, O, N atoms and SDD for Zn atom. Harmonic vibration frequency calculations were performed for all stationary points to confirm them as a local minima (zero imaginary frequencies). Orbital composition, excited state analysis employed by Multiwfn program and VMD.<sup>5, 6</sup> Approximate solvent effects were taken into consideration based on SMD (Solvation Model Based on Density) in all calculations.

### Video illustration

The non-flammability of the DMAC-based electrolyte was confirmed by a comparative ignition test using glass fiber C separators soaked in either DMAC-based or  $\text{H}_2\text{O}$  electrolyte. Since the electrolyte consists of 90 vol% DMAC (boiling point: 165 °C, flash point: 70 °C) and 10 vol% non-flammable water, both separators failed to ignite within 3–4 s of exposure to a lighter flame. Although DMAC alone is flammable, the incorporation of 10 vol%  $\text{H}_2\text{O}$  effectively enhances the flame-retardant properties of the electrolyte. The experimental procedure and results are documented in Supplementary **Video S1**.

**Table S1** Under identical conditions of temperature and air exposure, the mass data of 3 mL DMAC-based electrolyte and H<sub>2</sub>O electrolyte were collected.

| Electrolyte      | Pristine | After 1 day | After 3 days | After 5 days | After 10 days |
|------------------|----------|-------------|--------------|--------------|---------------|
|                  | (g)      | (g)         | (g)          | (g)          | (g)           |
| DMAC             | 4.087    | 4.085       | 4.082        | 4.080        | 4.071         |
| H <sub>2</sub> O | 4.062    | 4.026       | 3.946        | 3.861        | 3.656         |

Comparative evaporation tests were conducted under the same temperature and air exposure conditions as those used in the self-charging battery experiments. The mass changes of 3 mL samples of DMAC-based and H<sub>2</sub>O electrolytes were recorded after 1, 3, 5, and 10 days. Owing to the much lower saturated vapor pressure of DMAC (0.17 kPa at 25 °C) compared to H<sub>2</sub>O (3.17 kPa at 25 °C), the DMAC-based electrolyte exhibited significantly higher evaporation resistance (Table S1). Specifically, the average daily mass loss was only 0.4 % for the DMAC-based electrolyte, in contrast to 9.9 % for the H<sub>2</sub>O electrolyte.

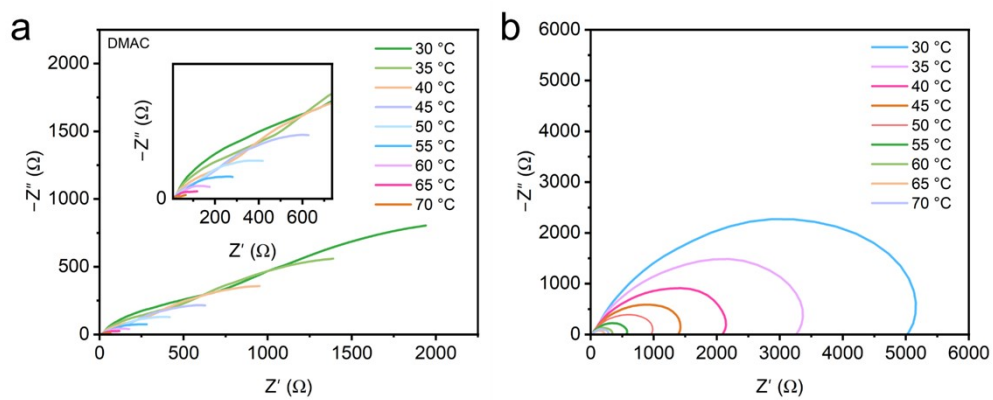

**Fig. S1** EIS of Zn||Zn battery with DMAC-based and H<sub>2</sub>O electrolyte at different temperatures from 70 °C to 30 °C.

**Table S2** The relevant physicochemical parameters of the seven solvents.<sup>7, 8</sup>

| Solvent name                    | 3D model<br>diagram                                                                 | DN   | Saturated vapor<br>pressure<br>(mmHg, at 25 °C) | Flash point (°C,<br>closed cup) |
|---------------------------------|-------------------------------------------------------------------------------------|------|-------------------------------------------------|---------------------------------|
| Acetonitrile (AN)               |    | 14   | 88.8                                            | 12.8                            |
| Acetone (ACE)                   |    | 17   | 231                                             | -16.99                          |
| Diethyl carbonate (DEC)         |    | 16   | 4.07 (Air = 1)                                  | 25                              |
| Propylene carbonate (PC)        |    | 15   | 0.045                                           | 135                             |
| N,N-dimethylformamide<br>(DMF)  |    | 26.6 | 2.51 (Air = 1)                                  | 58                              |
| N,N-dimethylacetamide<br>(DMAC) |   | 27.8 | 2                                               | 70                              |
| Dimethyl sulfoxide (DMSO)       |  | 29.8 | 0.6                                             | 95 (open cup)                   |
| Pyridine (Py)                   |  | 33.1 | 20.8                                            | 20                              |
| H <sub>2</sub> O                |  | 18   | 23.75                                           | /                               |

i. Donor number of solvents is provided by Refs. 7-8.

ii. Saturated vapor pressure and flash point provided by the website of PubChem.

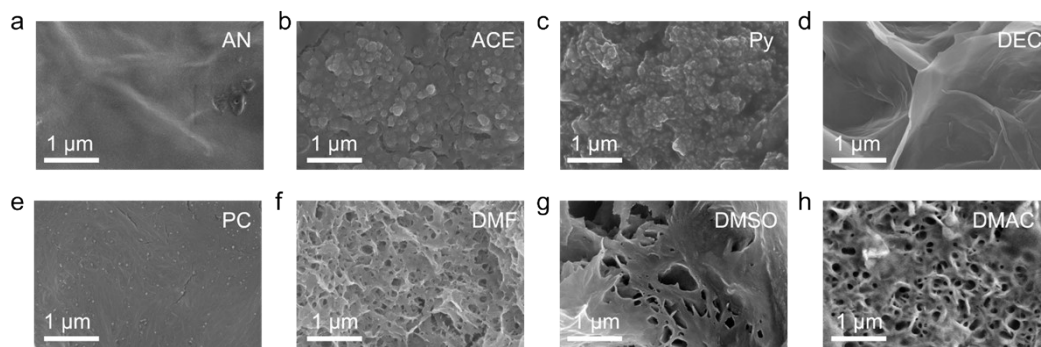

**Fig. S2** SEM images of the cathode surface in the different electrolytes (containing 10 vol% H<sub>2</sub>O and 0.5 M Zn(CF<sub>3</sub>SO<sub>3</sub>)<sub>2</sub>). (a) Acetonitrile (AN). (b) Acetone (ACE). (c) Pyridine (Py). (d) Diethyl carbonate (DEC). (e) Propylene carbonate (PC). (f) N,N-dimethylformamide (DMF). (g) Dimethyl sulfoxide (DMSO). (h) N,N-dimethylacetamide (DMAC).

Although DMF also formed a porous interface, it suffered from gradual decomposition during cycling due to poor stability against reactive oxygen species.<sup>9,10</sup>



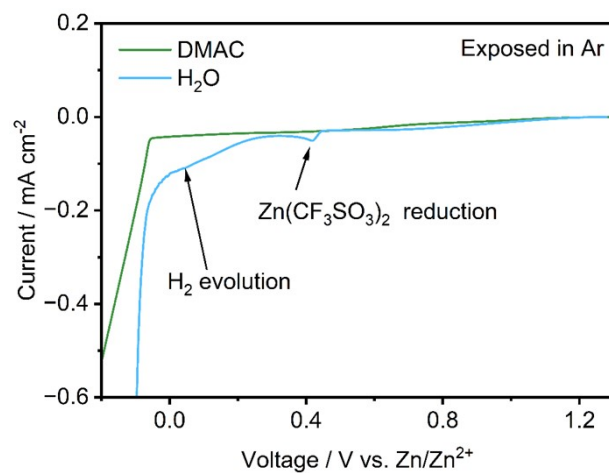

**Fig. S3** LSV of DMAC and H<sub>2</sub>O electrolyte in Zn||Ti batteries, which were exposed in an Ar environment.

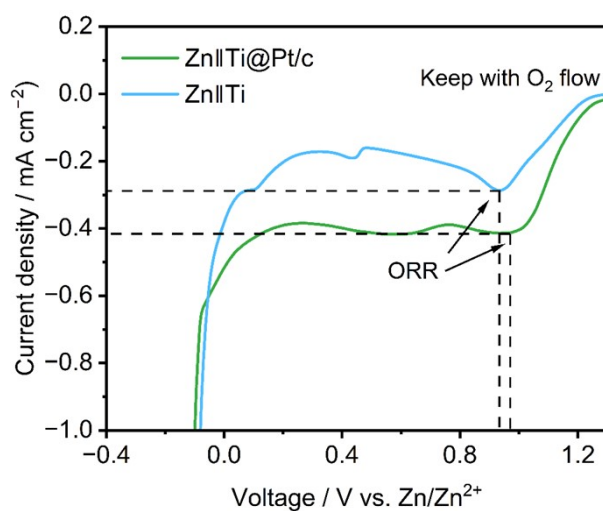

**Fig. S4** The comparison of ORR in H<sub>2</sub>O electrolytes under O<sub>2</sub> flow and scanned at 0.5 mV s<sup>-1</sup>, which were tested by Zn||Ti and Zn||Ti@Pt batteries, respectively.

Ti@Pt/C was used as the working electrode (Zn as the counter electrode), the ORR peak exhibited a positive potential shift accompanied by a larger current density, consistent with the enhanced catalytic activity of Pt/C toward oxygen reduction.

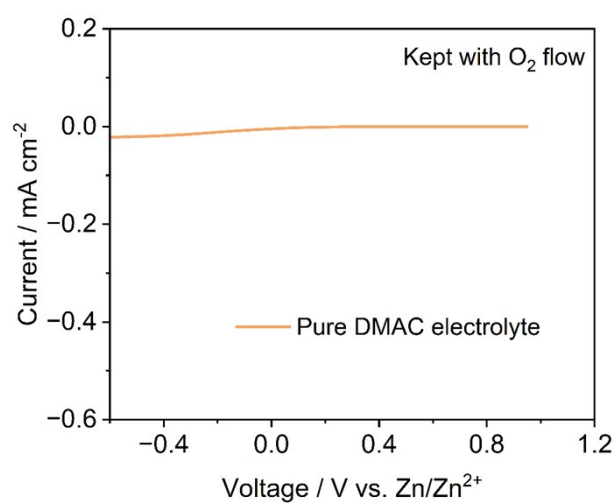

**Fig. S5** LSV of pure DMAC electrolyte, which was kept with O<sub>2</sub> flow and scanned at 0.5 mV s<sup>-1</sup>.

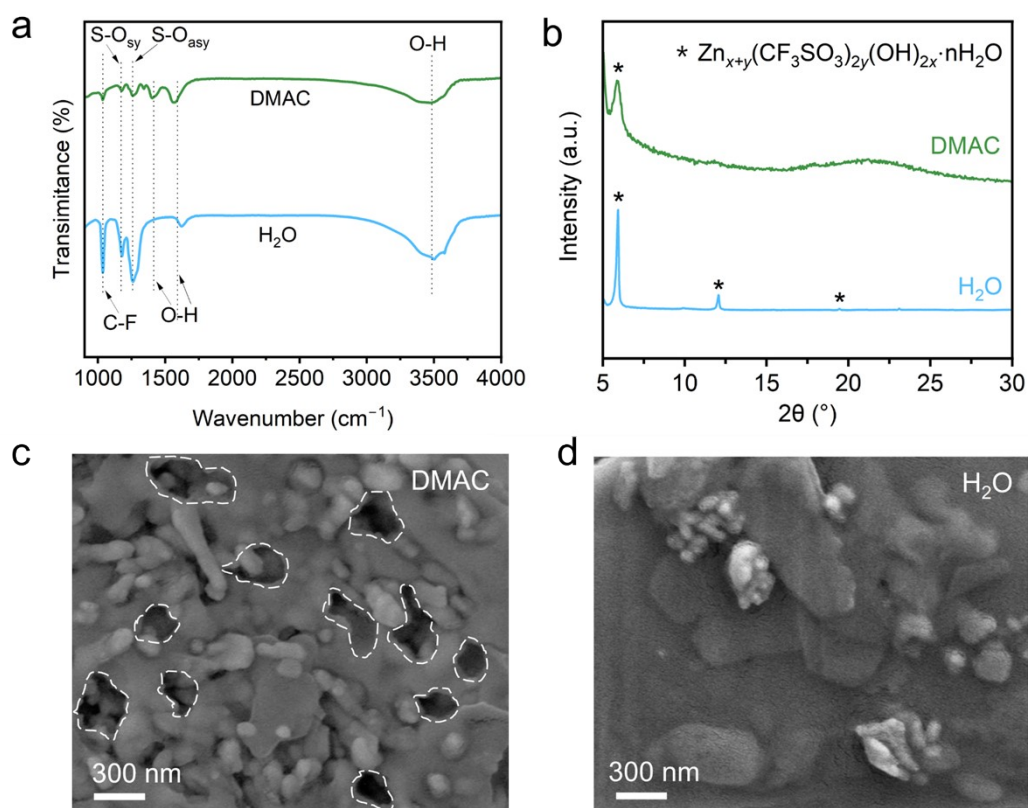

**Fig. S6** (a) FT-IR spectra, (b) XRD patterns, (c) and (d) SEM images of solvothermal synthetic results comparison for the passivation particles ( $\text{Zn}_{x+y}(\text{CF}_3\text{SO}_3)_{2y}(\text{OH})_{2x} \cdot n\text{H}_2\text{O}$ ) combining in DMAC and H<sub>2</sub>O electrolytes, respectively.

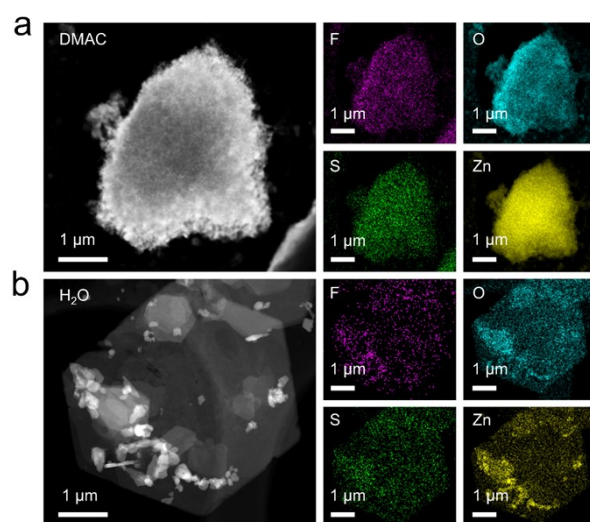

**Fig. S7** High-angle annular dark field (HADDF) and the corresponding TEM-EDS elemental mapping images of  $\text{Zn}_{x+y}(\text{CF}_3\text{SO}_3)_{2y}(\text{OH})_{2x} \cdot n\text{H}_2\text{O}$  crystal obtained from the solvothermal method of (a) DMAC-based and (b)  $\text{H}_2\text{O}$  electrolytes.

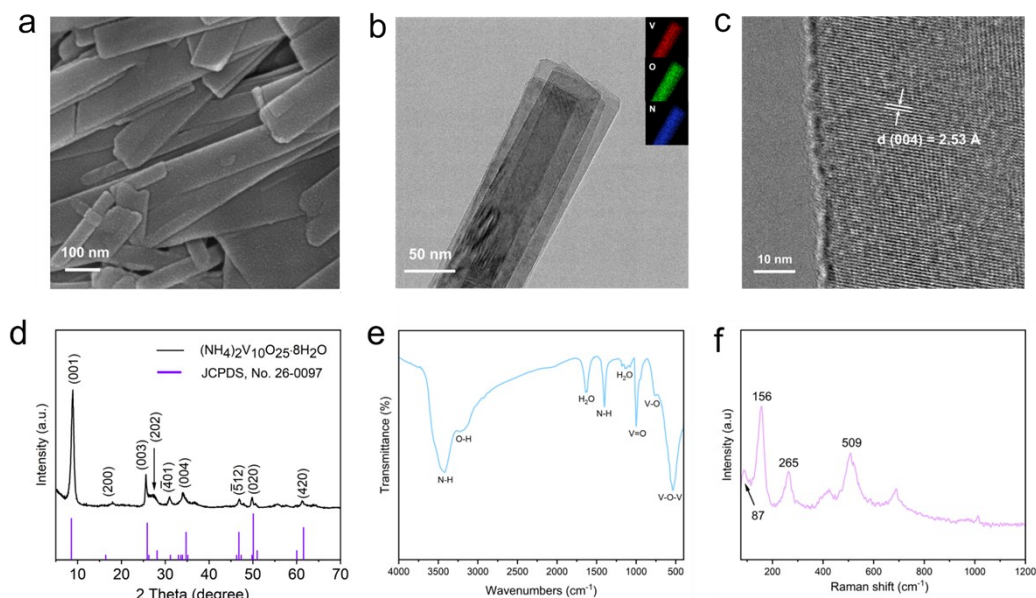

**Fig. S8** Morphology and crystal structure of NVO nanobelt. (a) SEM image. (b) TEM image and the insert are the elemental mapping. (c) HRTEM image. (d) XRD pattern. (e) FT-IR spectra. (f) Raman spectra.

The  $(\text{NH}_4)_2\text{V}_{10}\text{O}_{25}\cdot 8\text{H}_2\text{O}$  cathode was synthesized using a one-step hydrothermal method (see the synthesis method). X-ray diffraction (XRD) pattern presented in Fig. S8d, in which the diffraction peaks can be well indexed to the monoclinic NVO phase (JCPDS 26-0097) with lattice constants  $a = 1.154$ ,  $b = 0.364$ ,  $c = 1.112$  nm, and  $\beta = 112^\circ$ . SEM and TEM images (Fig S8a and b) show that the nanobelt NVO is about 50~100 nm wide, and long for several micrometers. As shown in the HRTEM (Fig. S8c), the lattice fringe with a spacing of 2.53 Å is consistent with the  $(-310)$  lattice plane of NVO. To further confirm the structure of the prepared material, FT-IR and Raman spectroscopy are shown in Fig. S8e and f.

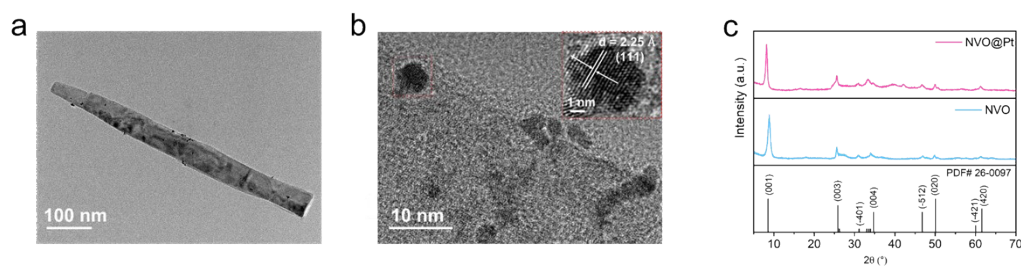

**Fig. S9** Nanocrystals Pt are in-situ loaded on NVO surface as the oxygen reduction catalyst: (a) TEM image of the Pt nanocrystals loaded onto the  $(\text{NH}_4)_2\text{V}_{10}\text{O}_{25}\cdot 8\text{H}_2\text{O}$  nanobelt surface.<sup>11</sup> (b) HRTEM image of  $(\text{NH}_4)_2\text{V}_{10}\text{O}_{25}\cdot 8\text{H}_2\text{O}@\text{Pt}$ , and the Pt high crystallinity image, the inset image is the Pt nanocrystals (111) lattice fringes with a d-spacing of 2.25 Å. (c) XRD patterns of  $(\text{NH}_4)_2\text{V}_{10}\text{O}_{25}\cdot 8\text{H}_2\text{O}$  nanobelt (NVO) and Pt nanocrystals loaded onto the NVO nanobelt (NVO@Pt).

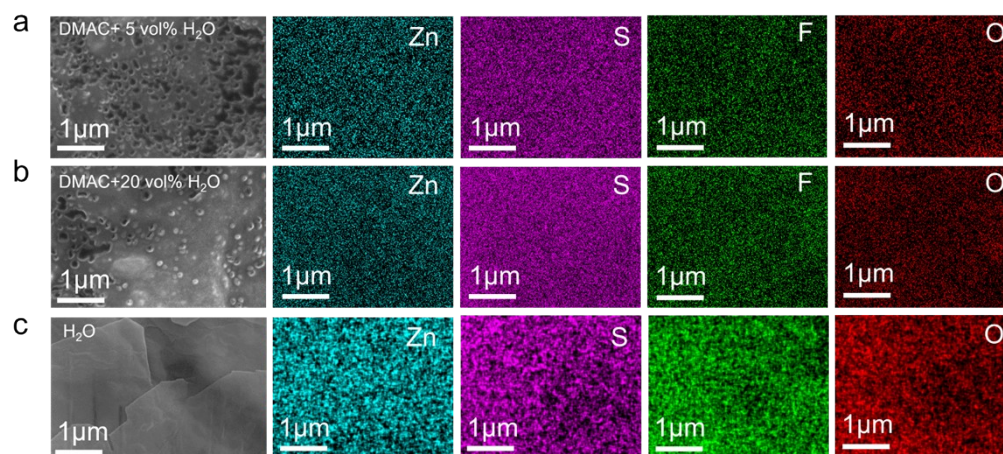

**Fig. S10** SEM and the corresponding EDS images of NVO@Pt cathode interface after 20 cycles in DMAC-based electrolytes containing (a) 5 vol% H<sub>2</sub>O, (b) 20 vol% H<sub>2</sub>O, and (c) pure H<sub>2</sub>O electrolyte, respectively.



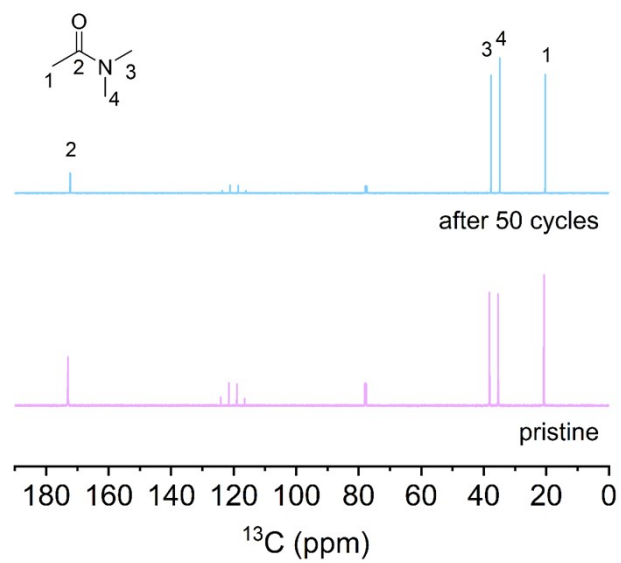

**Fig. S11** Comparison of the  $^{13}\text{C}$  spectra of the pristine DMAC-based electrolyte and after 50 cycles.

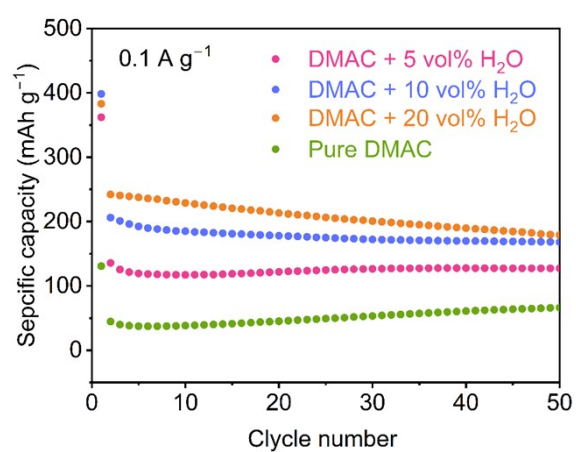

**Fig. S12** The discharge capacity of Zn||NVO@Pt conventional batteries at 0.1 A g<sup>-1</sup> in different volumes of H<sub>2</sub>O added in DMAC-based electrolytes.

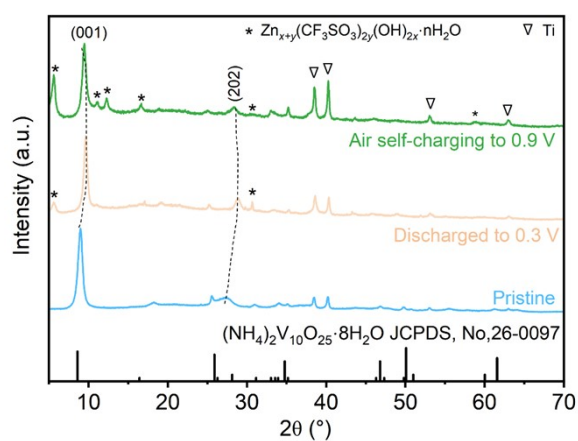

**Fig. S13** XRD patterns of the NVO@Pt cathode collected at the pristine state, discharged to 0.3 V, and air self-charging to 0.9 V in DMAC-based air self-charging batteries.

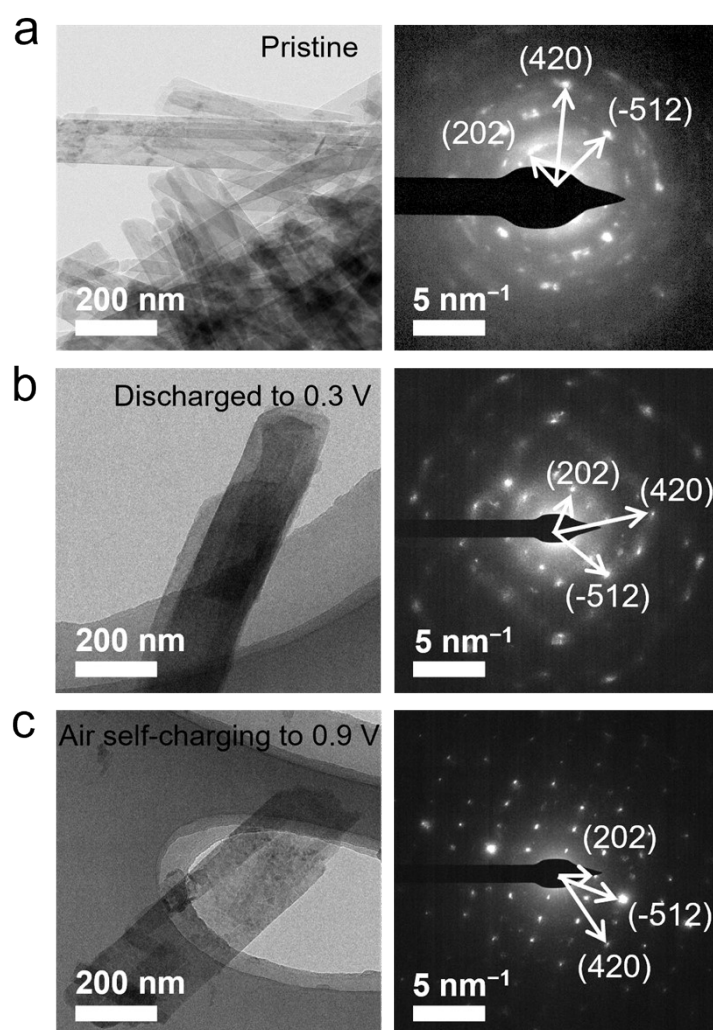

**Fig. S14** TEM images and selected area electron diffraction of the NVO@Pt cathode, which were collected at the (a) pristine state, (b) discharged to 0.3 V, and (c) air self-charging to 0.9 V in DMAC-based air self-charging batteries.

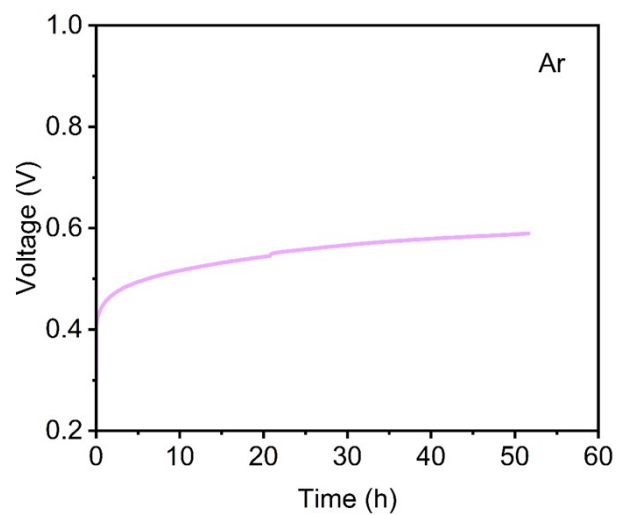

**Fig. S15** The open circuit voltage changes of Zn||NVO@Pt self-charging battery in the Ar environment.

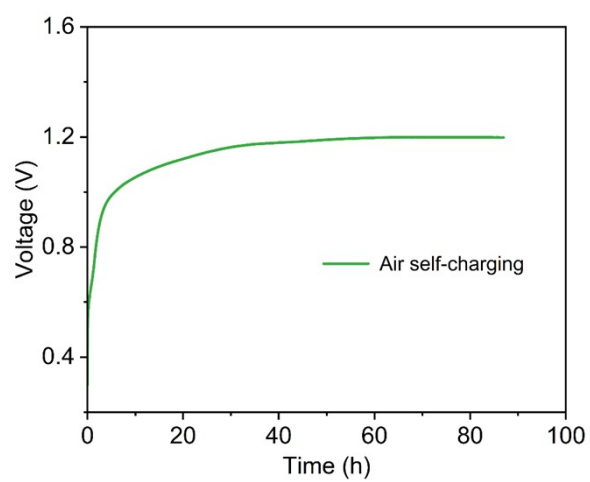

**Fig. S16** The limited self-charging voltage of the Zn||NVO@Pt battery in the DMAC-based electrolyte, which was exposed to air.

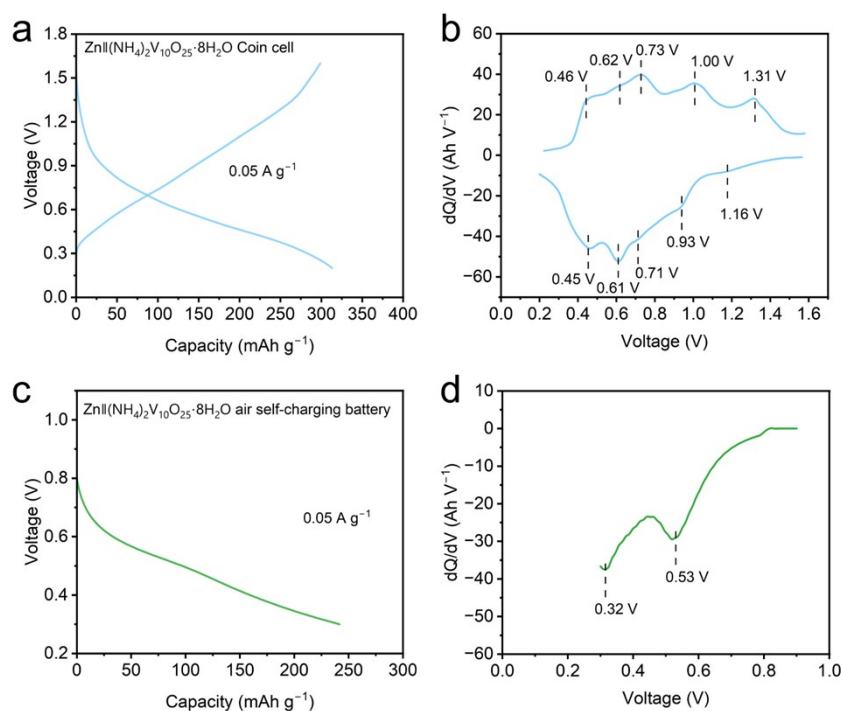

**Fig. S17** (a) Galvanostatic charge/discharge profiles of Zn||NVO@Pt conventional cells at 0.05 A g<sup>-1</sup> in DMAC-based electrolyte, and (b) the corresponding dQ/dV curve. (c) Galvanostatic discharge profile of Zn||NVO@Pt air self-charging batteries at 0.05 A g<sup>-1</sup> in DMAC-based electrolyte, and (d) the corresponding dQ/dV curve.

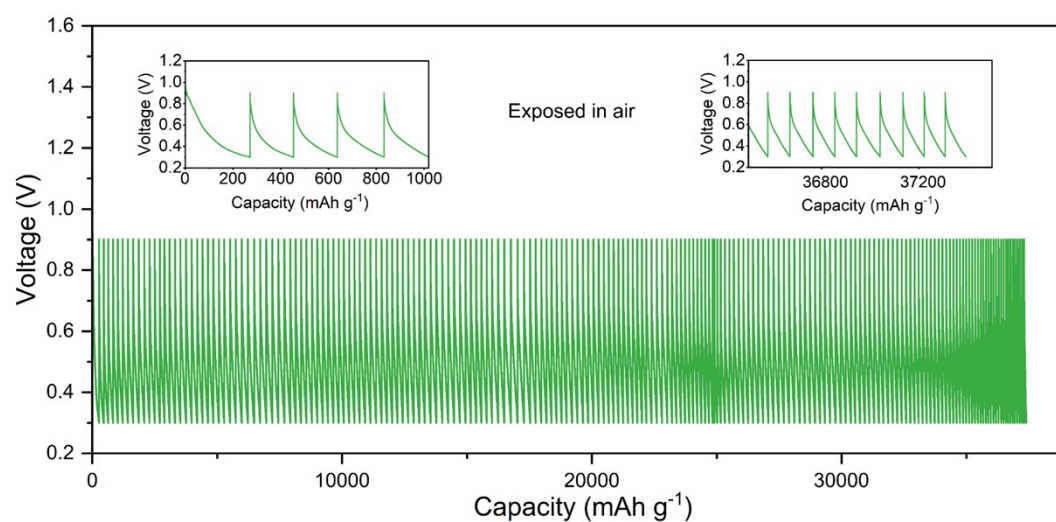

**Fig. S18** Repeated air self-charging/galvanostatic discharge cycles of Zn||NVO@Pt air self-charging battery in DMAC-based electrolyte.



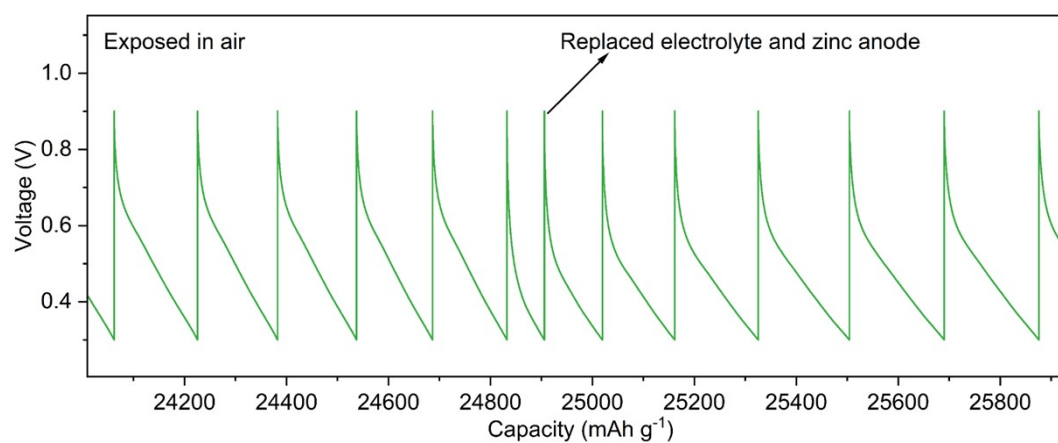

**Fig. S19** The enlarged image of the repeated air self-charging/galvanostatic discharging cycles of the Zn||NVO@Pt battery when the DMAC-based electrolyte and zinc anode are replaced.

**Table S3** The air self-charging capability and long cycle-life performance of the air self-charging batteries that have been reported until now.

| Battery                                  | Electrolyte                                                                                           | Air self-charging time | Cycle number | Current density (A g <sup>-1</sup> ) | Capacity accumulation (mAh g <sup>-1</sup> ) |
|------------------------------------------|-------------------------------------------------------------------------------------------------------|------------------------|--------------|--------------------------------------|----------------------------------------------|
| Zn  VS <sub>2</sub> <sup>12</sup>        | 2 M Zn(CF <sub>3</sub> SO <sub>3</sub> ) <sub>2</sub>                                                 | 4.1 h to 0.9 V         | 4            | 0.2                                  | 1500                                         |
| Zn  PANI@Pt <sup>11</sup>                | 1 M Zn(CF <sub>3</sub> SO <sub>3</sub> ) <sub>2</sub>                                                 | 9 h to 1.25 V          | 10           | 0.05                                 | 2180.8                                       |
| Zn  poly(4-HDPA)/AC <sup>13</sup>        | 2 M Zn(CF <sub>3</sub> SO <sub>3</sub> ) <sub>2</sub>                                                 | 12 h to 1.2 V          | 13           | 0.5                                  | /                                            |
| Zn  CaVO <sup>14</sup>                   | 4 M Zn(CF <sub>3</sub> SO <sub>3</sub> ) <sub>2</sub>                                                 | 24 h to 1.1 V          | 5            | 0.1                                  | 870                                          |
| Zn  AZPY <sup>15</sup>                   | 1 M ZnSO <sub>4</sub>                                                                                 | 9 h to 1.1 V           | 24           | /                                    | 5100                                         |
| Zn  VO <sub>2</sub> <sup>16</sup>        | PAM-ChNF gel<br>1 M Zn(CF <sub>3</sub> SO <sub>3</sub> ) <sub>2</sub> +<br>0.5 M CH <sub>3</sub> COOH | 3 h to 1.2 V           | 20           | 0.2                                  | 4000                                         |
| Zn  MoS <sub>2</sub> /PANI <sup>17</sup> | PAM/PEG gel 2 M Zn(CF <sub>3</sub> SO <sub>3</sub> ) <sub>2</sub>                                     | 24 h to 1.2 V          | 50           | 0.5                                  | 14000                                        |
| Zn  COF-PTO <sup>18</sup>                | 1 M Zn(CF <sub>3</sub> SO <sub>3</sub> ) <sub>2</sub>                                                 | 2 h to 1.1 V           | 100          | 1                                    | 6000                                         |
| Zn  VO <sub>2</sub> <sup>19</sup>        | ZnSO <sub>4</sub> + ZnI <sub>2</sub>                                                                  | 29 h to 1.2 V          | 9            | 0.3                                  | 1600                                         |
| Zn  PANINA <sup>20</sup>                 | 2 M ZnCl <sub>2</sub> +<br>3 M NH <sub>4</sub> Cl                                                     | /                      | 3            | 1                                    | 470                                          |
| Zn  Bi-MnO <sub>2</sub> <sup>21</sup>    | 2 M ZnSO <sub>4</sub> +<br>0.2 M MnSO <sub>4</sub>                                                    | 0.5 h to 1.28 V        | 10           | 0.1                                  | 1372.8                                       |
| PAF-305-6K/                              | 2 M                                                                                                   | 4 h to 1.13 V          | 20           |                                      | 4399                                         |

|                                                    |                                                                                                        |                |     |     |       |
|----------------------------------------------------|--------------------------------------------------------------------------------------------------------|----------------|-----|-----|-------|
| /H <sub>2</sub> O/O <sub>2</sub> /Pt <sup>22</sup> | Zn(CF <sub>3</sub> SO <sub>3</sub> ) <sub>2</sub> +<br>12 M KCF <sub>3</sub> SO <sub>3</sub><br>(Zn-K) |                |     |     |       |
| Pb  PTO <sup>23</sup>                              | 1 M H <sub>2</sub> SO <sub>4</sub>                                                                     | 12 h to 0.85 V | 200 | 1   | 23092 |
| Zn  NT-COF <sup>24</sup>                           | 2 M ZnSO <sub>4</sub>                                                                                  | 1 h to 1.25 V  | 10  | 0.2 | 1100  |
| Zn  poly(1,5-NAPD) <sup>25</sup>                   | 6 M KOH +<br>0.2 M<br>Zn(CH <sub>3</sub> COO) <sub>2</sub>                                             | 24 h to 1.2 V  | 100 | 0.2 | 16500 |
| Zn  BQPH <sup>26</sup>                             | 2 M ZnSO <sub>4</sub>                                                                                  | 12 h to 1.2 V  | 5   | 1   | 1200  |
| Zn  NVO@Pt                                         | DMAC with 10<br>vol% H <sub>2</sub> O + 2 M<br>Zn(CF <sub>3</sub> SO <sub>3</sub> ) <sub>2</sub>       | 4 h to 0.9 V   | 200 | 0.1 | 37392 |

## References

- 1 T. Wei, Q. Li, G. Yang and C. Wang, *J. Mater. Chem. A.*, 2018, **6**, 20402-20410.
- 2 D. P. Chong, *Can. J. Chem.*, 2018, **96**, 336-339.
- 3 C. Lee, W. Yang and R. G. Parr, *Physical Review. B.*, 1988, **37**, 785-789.
- 4 R. Ditchfield, W. J. Hehre and J. A. Pople, *The Journal of Chemical Physics.*, 1971, **54**, 724-728.
- 5 T. Lu and F. Chen, *J. Comput. Chem.*, 2011, **33**, 580-592.
- 6 T. Lu and Q. Chen, *Comput. Theor. Chem.*, 2021, **1200**, 1133249.
- 7 Y. Wang, H. Yang, T. Hu, N. Piao, F. Li and H.-M. Cheng, *Natl. Sci. Rev.*, 2025, **12**, nwaf100.
- 8 P. Zhou, Y. Xiang and K. Liu, *Energy Environ. Sci.*, 2024, **17**, 8057-8077.
- 9 Y. Chen, S. A. Freunberger, Z. Peng, F. Bardé and P. G. Bruce, *J. Am. Chem. Soc.*, 2012, **134**, 7952-7957.
- 10 J. Li, S. Ding, S. Zhang, W. Yan, Z.-F. Ma, X. Yuan, L. Mai and J. Zhang, *Energy Storage Mater.*, 2021, **43**, 97-119.
- 11 W. Su, Y. Zhang, H. Wang, M. Yang and Z. Niu, *Adv. Mater.*, 2023, **36**, 2308042.
- 12 T. Li, X. Dong, H. Yang, J. Zhang, R. Huang, Z. Lv, Y. Li, S. Zhang, F. Huang and T. Lin, *Energy Environ. Sci.*, 2025, **18**, 3169-3176.
- 13 Q. Xu, X. Zhang, X. Yuan, W. Zhang, Y. Li, Y. Zhang and J. Liu, *Adv. Energy Mater.*, 2024, **14**, 2303475.
- 14 Y. Zhang, F. Wan, S. Huang, S. Wang, Z. Niu and J. Chen, *Nat. Commun.*, 2020, **11**, 2199.
- 15 D. Du, Y. Chen, H. Zhang, J. Zhao, L. Jin, W. Ji, H. Huang and S. Pang, *Angew. Chem. Int. Ed.*, 2024, **63**, e202408292.
- 16 C. Liu, W. Xu, C. Mei, M. Li, W. Chen, S. Hong, W. Y. Kim, S. y. Lee and Q. Wu, *Adv. Energy Mater.*, 2021, **11**, 20039902.
- 17 J. Shi, K. Mao, Q. Zhang, Z. Liu, F. Long, L. Wen, Y. Hou, X. Li, Y. Ma, Y. Yue, L. Li, C. Zhi and Y. Gao, *Nano Micro Lett.*, 2023, **15**, 53.
- 18 L. Zhong, C. Wang, J. He, Z. Lin, X. Yang, R. Li, S. Zhan, L. Zhao, D. Wu, H. Chen, Z. Tang, C. Zhi and H. Lv, *Adv. Mater.*, 2024, **36**, 2314050.
- 19 M. Zhang, T. Hu, X. Wang, P. Chang, L. Pan, Z. Jin, H. Mei, L. Cheng and L. Zhang, *Energy Storage Mater.*, 2022, **51**, 465-475.
- 20 X. Xie, Z. Fang, M. Yang, F. Zhu and D. Yu, *Adv. Funct. Mater.*, 2021, **31**, 2007942.
- 21 J. Zhao, X. Ge, A. Kumar, K. Yan, Y. Sun, X. Liu, X. Li and J. Pan, *Energy Storage Mater.*, 2025, **80**, 104360.
- 22 J. Wang, X. Zhang, Z. Liu, J. Yu, H. G. Wang, X. L. Wu, F. Cui and G. Zhu, *Angew. Chem. Int. Ed.*, 2024, **63**, e202401559.
- 23 F. Yue, Z. Tie, Y. Zhang, S. Bi, Y. Wang and Z. Niu, *Angew. Chem. Int. Ed. Engl.*, 2022, **61**, e202208513.
- 24 L. Zhao, C. Zhu, J. Ji, M. Li, Z. Kou, W. Li, F. Cai and L. Yuan, *Energy Storage Mater.*, 2025, **78**, 104273.
- 25 L. Yan, Y. Zhang, Z. Ni, Y. Zhang, J. Xu, T. Kong, J. Huang, W. Li, J. Ma and Y. Wang, *J. Am. Chem. Soc.*, 2021, **143**, 15369-15377.
- 26 Z. Tie, Y. Zhang, J. Zhu, S. Bi and Z. Niu, *J. Am. Chem. Soc.*, 2022, **144**, 10301-10308.
